# Supplementary material for: Structure of Main Protease from Human Coronavirus NL63: Insights for Wide Spectrum Anti-Coronavirus Drug Design
Source: PubMed Central journal article supplement (PMC4780191; doi:10.1038/srep22677), 2016-03-07
Supplement: srep22677-s1.pdf [file srep22677-s1.pdf]

# **Structure of Main Protease from Human Coronavirus NL63: Insights for Wide Spectrum Anti-Coronavirus Drug Design**

**Fenghua Wang<sup>1,+</sup>, Cheng Chen<sup>1,2,+</sup>, Wenjie Tan<sup>3</sup>, Kailin Yang<sup>4,\*</sup>, Haitao Yang<sup>1,2,\*</sup>**

<sup>1</sup>School of Life Sciences, Tianjin University, Tianjin, China.

<sup>2</sup>Tianjin International Joint Academy of Biotechnology and Medicine, Tianjin, China.

<sup>3</sup>Key Laboratory of Medical Virology, Ministry of Health, National Institute for Viral Disease Control and Prevention, Chinese Center for Disease Control and Prevention, Beijing, China.

<sup>4</sup>Cleveland Clinic Lerner College of Medicine of Case Western Reserve University, Cleveland, OH, USA.

<sup>+</sup>These authors contributed equally to this work.

<sup>\*</sup>Correspondence and requests for materials should be addressed to H.Y. (email: yanght@tju.edu.cn) or K.Y. (email: yangk2@ccf.org)

**Table S1. Name, NCBI accession number, and country of isolation of 30 NL63 clinical strains with complete genome sequence available.**

| <b>No.</b> | <b>Strain name</b> | <b>NCBI accession number</b> | <b>Country of isolation</b> |
|------------|--------------------|------------------------------|-----------------------------|
| 1          | Amsterdam I        | NC_005831                    | The Netherlands             |
| 2          | Amsterdam 057      | DQ445911                     | The Netherlands             |
| 3          | Amsterdam 496      | DQ445912                     | The Netherlands             |
| 4          | CBJ 037            | JX104161                     | China                       |
| 5          | CBJ 123            | JX524171                     | China                       |
| 6          | RPTEC/2004         | JX504050                     | United States               |
| 7          | USA/838-9/1983     | KF530110                     | United States               |
| 8          | USA/8712-17/1987   | KF530106                     | United States               |
| 9          | USA/891-4/1989     | KF530114                     | United States               |
| 10         | USA/891-6/1989     | KF530108                     | United States               |
| 11         | USA/901-24/1990    | KF530111                     | United States               |
| 12         | USA/903-28/1990    | KF530109                     | United States               |
| 13         | USA/904-20/1990    | KF530104                     | United States               |
| 14         | USA/905-25/1990    | KF530113                     | United States               |
| 15         | USA/911-56/1991    | KF530107                     | United States               |
| 16         | USA/0111-25/2001   | KF530112                     | United States               |
| 17         | USA/012-31/2001    | KF530105                     | United States               |
| 18         | DEN/2005/193       | JQ765568                     | United States               |
| 19         | DEN/2005/232       | JQ765569                     | United States               |
| 20         | DEN/2005/235       | JQ765570                     | United States               |
| 21         | DEN/2005/271       | JQ765571                     | United States               |
| 22         | DEN/2005/347       | JQ765572                     | United States               |
| 23         | DEN/2005/1062      | JQ765573                     | United States               |
| 24         | DEN/2005/1862      | JQ765574                     | United States               |
| 25         | DEN/2005/1876      | JQ765575                     | United States               |
| 26         | DEN/2009/9         | JQ765563                     | United States               |
| 27         | DEN/2009/14        | JQ765564                     | United States               |
| 28         | DEN/2009/15        | JQ765565                     | United States               |
| 29         | DEN/2008/16        | JQ765566                     | United States               |
| 30         | DEN/2009/20        | JQ765567                     | United States               |

**Figure S1. Sequence alignment of M<sup>pro</sup> from 30 NL63 clinical strains listed in Table S1.** Sequence alignment was performed using ClustalW2, and figure was generated using ESPript 3.0.

NC\_005831\_Amsterdam-I  
DQ445911\_Amsterdam-057  
DQ445912\_Amsterdam-496  
JX104161\_CBJ-037  
JX524171\_CBJ-123  
JX504050\_RPTEC/2004  
KF530110\_USA/838-9/1983  
KF530106\_USA/8712-17/1987  
KF530114\_USA/891-4/1989  
KF530108\_USA/891-6/1989  
KF530111\_USA/901-24/1990  
KF530109\_USA/903-28/1990  
KF530104\_USA/904-20/1990  
KF530113\_USA/905-25/1990  
KF530107\_USA/911-56/1991  
KF530112\_USA/0111-25/2001  
KF530105\_USA/012-31/2001  
JQ765568\_DEN/2005/193  
JQ765569\_DEN/2005/232  
JQ765570\_DEN/2005/235  
JQ765571\_DEN/2005/271  
JQ765572\_DEN/2005/347  
JQ765573\_DEN/2005/1062  
JQ765574\_DEN/2005/1862  
JQ765575\_DEN/2005/1876  
JQ765563\_DEN/2009/9  
JQ765564\_DEN/2009/14  
JQ765565\_DEN/2009/15  
JQ765566\_DEN/2008/16  
JQ765567\_DEN/2009/20

1 10 20 30 40 50 60 70  
SGLKKMAQPSGVCVERCVVRVCGSTVNLGVWLGDTVTCPRHVIAPSTTVLIDYDHAYSTMRLHNFVSNH  
SGLKKMAQPSGVCVERCVVRVCGSTVNLGVWLGDTVTCPRHVIAPSTTVLIDYDHAYSTMRLHNFVSNH

NC\_005831\_Amsterdam-I  
DQ445911\_Amsterdam-057  
DQ445912\_Amsterdam-496  
JX104161\_CBJ-037  
JX524171\_CBJ-123  
JX504050\_RPTEC/2004  
KF530110\_USA/838-9/1983  
KF530106\_USA/8712-17/1987  
KF530114\_USA/891-4/1989  
KF530108\_USA/891-6/1989  
KF530111\_USA/901-24/1990  
KF530109\_USA/903-28/1990  
KF530104\_USA/904-20/1990  
KF530113\_USA/905-25/1990  
KF530107\_USA/911-56/1991  
KF530112\_USA/0111-25/2001  
KF530105\_USA/012-31/2001  
JQ765568\_DEN/2005/193  
JQ765569\_DEN/2005/232  
JQ765570\_DEN/2005/235  
JQ765571\_DEN/2005/271  
JQ765572\_DEN/2005/347  
JQ765573\_DEN/2005/1062  
JQ765574\_DEN/2005/1862  
JQ765575\_DEN/2005/1876  
JQ765563\_DEN/2009/9  
JQ765564\_DEN/2009/14  
JQ765565\_DEN/2009/15  
JQ765566\_DEN/2008/16  
JQ765567\_DEN/2009/20

80 90 100 110 120 130 140  
GVFLGVVGVMTMHGSLVLRKVSQSNVHTPKHVEKTLKPGDSFNILACYEGIASGVFGVNLRTNFTIKGSFI  
GVFLGVVGVMTMHGSLVLRKVSQSNVHTPKHVEKTLKPGDSFNILACYEGIASGVFGVNLRTNFTIKGSFI

|                           |                                                                         |     |     |     |     |     |     |
|---------------------------|-------------------------------------------------------------------------|-----|-----|-----|-----|-----|-----|
|                           | 150                                                                     | 160 | 170 | 180 | 190 | 200 | 210 |
| NC_005831_Amsterdam-I     | NGACGSPGYNVRNDGTVEFCYLHQIELGSGAHVGSDF TGSVYGNFDDQPSLQVESANLMLSDNVVAFLYA |     |     |     |     |     |     |
| DQ445911_Amsterdam-057    | NGACGSPGYNVRNDGTVEFCYLHQIELGSGAHVGSDF TGSVYGNFDDQPSLQVESANLMLSDNVVAFLYA |     |     |     |     |     |     |
| DQ445912_Amsterdam-496    | NGACGSPGYNVRNDGTVEFCYLHQIELGSGAHVGSDF TGSVYGNFDDQPSLQVESANLMLSDNVVAFLYA |     |     |     |     |     |     |
| JX104161_CBJ-037          | NGACGSPGYNVRNDGTVEFCYLHQIELGSGAHVGSDF TGSVYGNFDDQPSLQVESANLMLSDNVVAFLYA |     |     |     |     |     |     |
| JX524171_CBJ-123          | NGACGSPGYNVRNDGTVEFCYLHQIELGSGAHVGSDF TGSVYGNFDDQPSLQVESANLMLSDNVVAFLYA |     |     |     |     |     |     |
| JX504050_RPTEC/2004       | NGACGSPGYNVRNDGTVEFCYLHQIELGSGAHVGSDF TGSVYGNFDDQPSLQVESANLMLSDNVVAFLYA |     |     |     |     |     |     |
| KF530110_USA/838-9/1983   | NGACGSPGYNVRNDGTVEFCYLHQIELGSGAHVGSDF TGSVYGNFDDQPSLQVESANLMLSDNVVAFLYA |     |     |     |     |     |     |
| KF530106_USA/8712-17/1987 | NGACGSPGYNVRNDGTVEFCYLHQIELGSGAHVGSDF TGSVYGNFDDQPSLQVESANLMLSDNVVAFLYA |     |     |     |     |     |     |
| KF530114_USA/891-4/1989   | NGACGSPGYNVRNDGTVEFCYLHQIELGSGAHVGSDF TGSVYGNFDDQPSLQVESANLMLSDNVVAFLYA |     |     |     |     |     |     |
| KF530108_USA/891-6/1989   | NGACGSPGYNVRNDGTVEFCYLHQIELGSGAHVGSDF TGSVYGNFDDQPSLQVESANLMLSDNVVAFLYA |     |     |     |     |     |     |
| KF530111_USA/901-24/1990  | NGACGSPGYNVRNDGTVEFCYLHQIELGSGAHVGSDF TGSVYGNFDDQPSLQVESANLMLSDNVVAFLYA |     |     |     |     |     |     |
| KF530109_USA/903-28/1990  | NGACGSPGYNVRNDGTVEFCYLHQIELGSGAHVGSDF TGSVYGNFDDQPSLQVESANLMLSDNVVAFLYA |     |     |     |     |     |     |
| KF530104_USA/904-20/1990  | NGACGSPGYNVRNDGTVEFCYLHQIELGSGAHVGSDF TGSVYGNFDDQPSLQVESANLMLSDNVVAFLYA |     |     |     |     |     |     |
| KF530113_USA/905-25/1990  | NGACGSPGYNVRNDGTVEFCYLHQIELGSGAHVGSDF TGSVYGNFDDQPSLQVESANLMLSDNVVAFLYA |     |     |     |     |     |     |
| KF530107_USA/911-56/1991  | NGACGSPGYNVRNDGTVEFCYLHQIELGSGAHVGSDF TGSVYGNFDDQPSLQVESANLMLSDNVVAFLYA |     |     |     |     |     |     |
| KF530112_USA/0111-25/2001 | NGACGSPGYNVRNDGTVEFCYLHQIELGSGAHVGSDF TGSVYGNFDDQPSLQVESANLMLSDNVVAFLYA |     |     |     |     |     |     |
| KF530105_USA/012-31/2001  | NGACGSPGYNVRNDGTVEFCYLHQIELGSGAHVGSDF TGSVYGNFDDQPSLQVESANLMLSDNVVAFLYA |     |     |     |     |     |     |
| JQ765568_DEN/2005/193     | NGACGSPGYNVRNDGTVEFCYLHQIELGSGAHVGSDF TGSVYGNFDDQPSLQVESANLMLSDNVVAFLYA |     |     |     |     |     |     |
| JQ765569_DEN/2005/232     | NGACGSPGYNVRNDGTVEFCYLHQIELGSGAHVGSDF TGSVYGNFDDQPSLQVESANLMLSDNVVAFLYA |     |     |     |     |     |     |
| JQ765570_DEN/2005/235     | NGACGSPGYNVRNDGTVEFCYLHQIELGSGAHVGSDF TGSVYGNFDDQPSLQVESANLMLSDNVVAFLYA |     |     |     |     |     |     |
| JQ765571_DEN/2005/271     | NGACGSPGYNVRNDGTVEFCYLHQIELGSGAHVGSDF TGSVYGNFDDQPSLQVESANLMLSDNVVAFLYA |     |     |     |     |     |     |
| JQ765572_DEN/2005/347     | NGACGSPGYNVRNDGTVEFCYLHQIELGSGAHVGSDF TGSVYGNFDDQPSLQVESANLMLSDNVVAFLYA |     |     |     |     |     |     |
| JQ765573_DEN/2005/1062    | NGACGSPGYNVRNDGTVEFCYLHQIELGSGAHVGSDF TGSVYGNFDDQPSLQVESANLMLSDNVVAFLYA |     |     |     |     |     |     |
| JQ765574_DEN/2005/1862    | NGACGSPGYNVRNDGTVEFCYLHQIELGSGAHVGSDF TGSVYGNFDDQPSLQVESANLMLSDNVVAFLYA |     |     |     |     |     |     |
| JQ765575_DEN/2005/1876    | NGACGSPGYNVRNDGTVEFCYLHQIELGSGAHVGSDF TGSVYGNFDDQPSLQVESANLMLSDNVVAFLYA |     |     |     |     |     |     |
| JQ765563_DEN/2009/9       | NGACGSPGYNVRNDGTVEFCYLHQIELGSGAHVGSDF TGSVYGNFDDQPSLQVESANLMLSDNVVAFLYA |     |     |     |     |     |     |
| JQ765564_DEN/2009/14      | NGACGSPGYNVRNDGTVEFCYLHQIELGSGAHVGSDF TGSVYGNFDDQPSLQVESANLMLSDNVVAFLYA |     |     |     |     |     |     |
| JQ765565_DEN/2009/15      | NGACGSPGYNVRNDGTVEFCYLHQIELGSGAHVGSDF TGSVYGNFDDQPSLQVESANLMLSDNVVAFLYA |     |     |     |     |     |     |
| JQ765566_DEN/2008/16      | NGACGSPGYNVRNDGTVEFCYLHQIELGSGAHVGSDF TGSVYGNFDDQPSLQVESANLMLSDNVVAFLYA |     |     |     |     |     |     |
| JQ765567_DEN/2009/20      | NGACGSPGYNVRNDGTVEFCYLHQIELGSGAHVGSDF TGSVYGNFDDQPSLQVESANLMLSDNVVAFLYA |     |     |     |     |     |     |

|                           |                                                                            |     |     |     |     |     |     |
|---------------------------|----------------------------------------------------------------------------|-----|-----|-----|-----|-----|-----|
|                           | 220                                                                        | 230 | 240 | 250 | 260 | 270 | 280 |
| NC_005831_Amsterdam-I     | ALLNGCRWWL RSTRVNVDFGFNEWAMANGYTSVSSVECYSI LAAKTGVSV EQLLASIQHLHEGFGGKNILG |     |     |     |     |     |     |
| DQ445911_Amsterdam-057    | ALLNGCRWWL RSTRVNVDFGFNEWAMANGYTSVSSVECYSI LAAKTGVSV EQLLASIQHLHEGFGGKNILG |     |     |     |     |     |     |
| DQ445912_Amsterdam-496    | ALLNGCRWWL RSTRVNVDFGFNEWAMANGYTSVSSVECYSI LAAKTGVSV EQLLASIQHLHEGFGGKNILG |     |     |     |     |     |     |
| JX104161_CBJ-037          | ALLNGCRWWL RSTRVNVDFGFNEWAMANGYTSVSSVECYSI LAAKTGVSV EQLLASIQHLHEGFGGKNILG |     |     |     |     |     |     |
| JX524171_CBJ-123          | ALLNGCRWWL RSTRVNVDFGFNEWAMANGYTSVSSVECYSI LAAKTGVSV EQLLASIQHLHEGFGGKNILG |     |     |     |     |     |     |
| JX504050_RPTEC/2004       | ALLNGCRWWL RSTRVNVDFGFNEWAMANGYTSVSSVECYSI LAAKTGVSV EQLLASIQHLHEGFGGKNILG |     |     |     |     |     |     |
| KF530110_USA/838-9/1983   | ALLNGCRWWL RSTRVNVDFGFNEWAMANGYTSVSSVECYSI LAAKTGVSV EQLLASIQHLHEGFGGKNILG |     |     |     |     |     |     |
| KF530106_USA/8712-17/1987 | ALLNGCRWWL RSTRVNVDFGFNEWAMANGYTSVSSVECYSI LAAKTGVSV EQLLASIQHLHEGFGGKNILG |     |     |     |     |     |     |
| KF530114_USA/891-4/1989   | ALLNGCRWWL RSTRVNVDFGFNEWAMANGYTSVSSVECYSI LAAKTGVSV EQLLASIQHLHEGFGGKNILG |     |     |     |     |     |     |
| KF530108_USA/891-6/1989   | ALLNGCRWWL RSTRVNVDFGFNEWAMANGYTSVSSVECYSI LAAKTGVSV EQLLASIQHLHEGFGGKNILG |     |     |     |     |     |     |
| KF530111_USA/901-24/1990  | ALLNGCRWWL RSTRVNVDFGFNEWAMANGYTSVSSVECYSI LAAKTGVSV EQLLASIQHLHEGFGGKNILG |     |     |     |     |     |     |
| KF530109_USA/903-28/1990  | ALLNGCRWWL RSTRVNVDFGFNEWAMANGYTSVSSVECYSI LAAKTGVSV EQLLASIQHLHEGFGGKNILG |     |     |     |     |     |     |
| KF530104_USA/904-20/1990  | ALLNGCRWWL RSTRVNVDFGFNEWAMANGYTSVSSVECYSI LAAKTGVSV EQLLASIQHLHEGFGGKNILG |     |     |     |     |     |     |
| KF530113_USA/905-25/1990  | ALLNGCRWWL RSTRVNVDFGFNEWAMANGYTSVSSVECYSI LAAKTGVSV EQLLASIQHLHEGFGGKNILG |     |     |     |     |     |     |
| KF530107_USA/911-56/1991  | ALLNGCRWWL RSTRVNVDFGFNEWAMANGYTSVSSVECYSI LAAKTGVSV EQLLASIQHLHEGFGGKNILG |     |     |     |     |     |     |
| KF530112_USA/0111-25/2001 | ALLNGCRWWL RSTRVNVDFGFNEWAMANGYTSVSSVECYSI LAAKTGVSV EQLLASIQHLHEGFGGKNILG |     |     |     |     |     |     |
| KF530105_USA/012-31/2001  | ALLNGCRWWL RSTRVNVDFGFNEWAMANGYTSVSSVECYSI LAAKTGVSV EQLLASIQHLHEGFGGKNILG |     |     |     |     |     |     |
| JQ765568_DEN/2005/193     | ALLNGCRWWL RSTRVNVDFGFNEWAMANGYTSVSSVECYSI LAAKTGVSV EQLLASIQHLHEGFGGKNILG |     |     |     |     |     |     |
| JQ765569_DEN/2005/232     | ALLNGCRWWL RSTRVNVDFGFNEWAMANGYTSVSSVECYSI LAAKTGVSV EQLLASIQHLHEGFGGKNILG |     |     |     |     |     |     |
| JQ765570_DEN/2005/235     | ALLNGCRWWL RSTRVNVDFGFNEWAMANGYTSVSSVECYSI LAAKTGVSV EQLLASIQHLHEGFGGKNILG |     |     |     |     |     |     |
| JQ765571_DEN/2005/271     | ALLNGCRWWL RSTRVNVDFGFNEWAMANGYTSVSSVECYSI LAAKTGVSV EQLLASIQHLHEGFGGKNILG |     |     |     |     |     |     |
| JQ765572_DEN/2005/347     | ALLNGCRWWL RSTRVNVDFGFNEWAMANGYTSVSSVECYSI LAAKTGVSV EQLLASIQHLHEGFGGKNILG |     |     |     |     |     |     |
| JQ765573_DEN/2005/1062    | ALLNGCRWWL RSTRVNVDFGFNEWAMANGYTSVSSVECYSI LAAKTGVSV EQLLASIQHLHEGFGGKNILG |     |     |     |     |     |     |
| JQ765574_DEN/2005/1862    | ALLNGCRWWL RSTRVNVDFGFNEWAMANGYTSVSSVECYSI LAAKTGVSV EQLLASIQHLHEGFGGKNILG |     |     |     |     |     |     |
| JQ765575_DEN/2005/1876    | ALLNGCRWWL RSTRVNVDFGFNEWAMANGYTSVSSVECYSI LAAKTGVSV EQLLASIQHLHEGFGGKNILG |     |     |     |     |     |     |
| JQ765563_DEN/2009/9       | ALLNGCRWWL RSTRVNVDFGFNEWAMANGYTSVSSVECYSI LAAKTGVSV EQLLASIQHLHEGFGGKNILG |     |     |     |     |     |     |
| JQ765564_DEN/2009/14      | ALLNGCRWWL RSTRVNVDFGFNEWAMANGYTSVSSVECYSI LAAKTGVSV EQLLASIQHLHEGFGGKNILG |     |     |     |     |     |     |
| JQ765565_DEN/2009/15      | ALLNGCRWWL RSTRVNVDFGFNEWAMANGYTSVSSVECYSI LAAKTGVSV EQLLASIQHLHEGFGGKNILG |     |     |     |     |     |     |
| JQ765566_DEN/2008/16      | ALLNGCRWWL RSTRVNVDFGFNEWAMANGYTSVSSVECYSI LAAKTGVSV EQLLASIQHLHEGFGGKNILG |     |     |     |     |     |     |
| JQ765567_DEN/2009/20      | ALLNGCRWWL RSTRVNVDFGFNEWAMANGYTSVSSVECYSI LAAKTGVSV EQLLASIQHLHEGFGGKNILG |     |     |     |     |     |     |

NC\_005831\_Amsterdam-I  
DQ445911\_Amsterdam-057  
DQ445912\_Amsterdam-496  
JX104161\_CBJ-037  
JX524171\_CBJ-123  
JX504050\_RPTEC/2004  
KF530110\_USA/838-9/1983  
KF530106\_USA/8712-17/1987  
KF530114\_USA/891-4/1989  
KF530108\_USA/891-6/1989  
KF530111\_USA/901-24/1990  
KF530109\_USA/903-28/1990  
KF530104\_USA/904-20/1990  
KF530113\_USA/905-25/1990  
KF530107\_USA/911-56/1991  
KF530112\_USA/0111-25/2001  
KF530105\_USA/012-31/2001  
JQ765568\_DEN/2005/193  
JQ765569\_DEN/2005/232  
JQ765570\_DEN/2005/235  
JQ765571\_DEN/2005/271  
JQ765572\_DEN/2005/347  
JQ765573\_DEN/2005/1062  
JQ765574\_DEN/2005/1862  
JQ765575\_DEN/2005/1876  
JQ765563\_DEN/2009/9  
JQ765564\_DEN/2009/14  
JQ765565\_DEN/2009/15  
JQ765566\_DEN/2008/16  
JQ765567\_DEN/2009/20

YSSLCDEFTLAEVVKQMYGVNLO  
YSSLCDEFTLAEVVKQMYGVNLO
